# Supplementary material for: A Longitudinal Study on the Effect of Exercise Habits on Locomotive Syndrome and Quality of Life during the Coronavirus Disease 2019 Pandemic
Source: MDPI journal article supplement (doi:10.3390/jcm13051385), 2024-02-28
Supplement: s1 [file s1]

## Supplementary materials

**Table S1.** The comparison of each parameter in 2018 between the N and E groups

| 2018                      | Total (n=200) | N (n=112) | E (n=88)  | p     | Cohen's d |
|---------------------------|---------------|-----------|-----------|-------|-----------|
| Men/women                 | 95/105        | 48/64     | 47/41     | 0.138 |           |
| Age (yrs)                 | 66.5±9.1      | 65.2±9.3  | 68.1±8.5  | 0.024 | -0.325    |
| Height (cm)               | 158.2±8.2     | 157.7±8.4 | 158.8±8.0 | 0.355 | -0.132    |
| Weight (kg)               | 59±10.7       | 58.8±10.6 | 59.2±10.9 | 0.769 | -0.042    |
| BMI (kg/m <sup>2</sup> )  | 23.5±3.2      | 23.5±3.3  | 23.4±3.1  | 0.702 | 0.055     |
| BFP (%)                   | 27.8±6.5      | 28.4±7.0  | 27.1±5.9  | 0.154 | 0.206     |
| SMI (kg/m <sup>2</sup> )  | 7.31±1.13     | 7.35±1.14 | 7.24±1.12 | 0.650 | 0.095     |
| Right Grip strength       | 30.2±9.7      | 29.2±9.8  | 31.4±9.5  | 0.109 | -0.23     |
| Left Grip strength        | 29.1±9.7      | 28.3±9.7  | 30.3±9.7  | 0.148 | -0.208    |
| Back muscle strength (kg) | 80.3±34.2     | 82.7±33.3 | 77.1±35.5 | 0.38  | 0.162     |
| Gait speed (m/s)          | 2.2±0.30      | 2.2±0.36  | 2.12±0.27 | 0.211 | 0.231     |
| PF                        | 88.5±17.0     | 86.7±15.6 | 90.7±18.5 | 0.105 | -0.232    |
| RP                        | 87.3±21.8     | 87±22.5   | 87.7±21.0 | 0.818 | -0.033    |
| BP                        | 71.2±23.5     | 70.9±24.2 | 71.5±22.6 | 0.837 | -0.029    |
| GH                        | 66.7±19.7     | 66.5±19.2 | 66.9±20.4 | 0.875 | -0.022    |
| VT                        | 60.9±19.5     | 58.5±19.0 | 63.8±19.9 | 0.057 | -0.272    |

|             |           |           |           |       |        |
|-------------|-----------|-----------|-----------|-------|--------|
| SF          | 86.1±20.7 | 86.8±22.1 | 85.2±18.9 | 0.588 | 0.077  |
| RE          | 88±22.6   | 88.2±23.7 | 87.7±21.4 | 0.875 | 0.022  |
| MH          | 75.5±18.2 | 74.4±18.8 | 76.9±17.4 | 0.342 | -0.136 |
| PCS         | 49.2±9.3  | 48.7±9.3  | 49.9±9.3  | 0.364 | -0.131 |
| MCS         | 51.5±9.6  | 50.9±9.4  | 52.3±9.8  | 0.306 | -0.148 |
| RCS         | 49.9±11.3 | 50.7±11.2 | 49±11.3   | 0.293 | 0.152  |
| EQ-5D-5L    | 0.89±0.13 | 0.89±0.12 | 0.89±0.13 | 0.778 | 0.04   |
| GLFS-25     | 6.9±9.3   | 7.6±9.7   | 6±8.8     | 0.241 | 0.168  |
| LS (NLS/LS) | 132/68    | 70/42     | 62/26     | 0.238 |        |

---

N group, the group without exercise habits in 2018; E group, the group with exercise habits in 2018; BMI, body mass index; BFP, body fat percentage; SMI, skeletal muscle mass index, PF, physical functioning; GH, general health; RP, physical role; BP, physical pain; VT, vitality; SF, social functioning; RE, emotional role; MH, mental health; PCS, physical component summary; MCS, mental component summary; RCS, role/social component summary; EQ-5D-5L, EuroQoL 5-dimension 5-level; GLFS-25, 25-question geriatric motor function rating scale; LS, locomotive syndrome; LS(NLS/LS), normal group (NLS group)/LS group (LS group)

**Table S2.** Comparison of parameters between the 2022N and 2022E groups in N group

| 2018                      | N (n=112) | 2022N (n=89) | 2022E (n=23) | p     | Cohen's d |
|---------------------------|-----------|--------------|--------------|-------|-----------|
| Men/women                 | 48/64     | 37/52        | 11/12        | 0.589 |           |
| Age (yrs)                 | 65.2±9.3  | 65±9.0       | 66±10.6      | 0.674 | -0.099    |
| Height (cm)               | 157.7±8.4 | 157.5±8.4    | 158.4±8.6    | 0.684 | -0.095    |
| Weight (kg)               | 58.8±10.6 | 58.6±10.6    | 59.3±11.0    | 0.792 | -0.062    |
| BMI (kg/m <sup>2</sup> )  | 23.5±3.3  | 23.6±3.3     | 23.5±3.1     | 0.968 | 0.009     |
| BFP (%)                   | 28.4±7.0  | 28.7±7.0     | 27.1±6.9     | 0.320 | 0.239     |
| SMI (kg/m <sup>2</sup> )  | 7.35±1.14 | 7.39±1.14    | 7.2±1.15     | 0.594 | 0.169     |
| Right Grip strength       | 29.2±9.8  | 29.2±9.8     | 29.2±10.0    | 0.972 | -0.008    |
| Left Grip strength        | 28.3±9.7  | 28±9.6       | 29.3±10.1    | 0.566 | -0.135    |
| Back muscle strength (kg) | 82.7±33.3 | 80.7±34.4    | 88.8±30.2    | 0.390 | -0.242    |
| Gait speed (m/s)          | 2.2±0.36  | 2.21±0.35    | 2.16±0.42    | 0.570 | 0.159     |
| PF                        | 86.7±15.6 | 86.6±14.2    | 87.3±20.6    | 0.357 | -0.049    |
| RP                        | 87±22.5   | 86±22.4      | 90.8±23.1    | 0.163 | -0.21     |
| BP                        | 70.9±24.2 | 68.9±24.2    | 78.4±23.4    | 0.050 | -0.397    |
| GH                        | 66.5±19.2 | 66.7±19.4    | 65.7±18.9    | 0.834 | 0.054     |
| VT                        | 58.5±19   | 57.9±19.3    | 61.1±17.8    | 0.293 | -0.172    |

|             |           |           |           |       |        |
|-------------|-----------|-----------|-----------|-------|--------|
| SF          | 86.8±22.1 | 86.1±21.7 | 89.7±23.7 | 0.190 | -0.162 |
| RE          | 88.2±23.7 | 87.5±23.9 | 91.3±23.1 | 0.306 | -0.162 |
| MH          | 74.4±18.8 | 74.1±18.1 | 75.7±21.6 | 0.464 | -0.081 |
| PCS         | 48.7±9.3  | 48.1±9.6  | 51.1±7.6  | 0.279 | -0.329 |
| MCS         | 50.9±9.4  | 50.6±10   | 52.1±6.5  | 0.535 |        |
| RCS         | 50.7±11.2 | 50±11.6   | 53.5±9.3  | 0.062 | -0.316 |
| EQ-5D-5L    | 0.89±0.12 | 0.89±0.13 | 0.92±0.07 | 0.395 | -0.258 |
| GLFS-25     | 7.6±9.7   | 8.1±10.5  | 5.4±5.2   | 0.344 | 0.288  |
| LS (NLS/LS) | 70/42     | 54/35     | 16/7      | 0.432 |        |

---

N group, the group without exercise habits in 2018; 2022N group, the group without exercise habits in 2022; 2022E group, the group with exercise habits in 2022; BMI, body mass index; BFP, body fat percentage; SMI, skeletal muscle mass index, PF, physical functioning; GH, general health; RP, physical role; BP, physical pain; VT, vitality; SF, social functioning; RE, emotional role; MH, mental health; PCS, physical component summary; MCS, mental component summary; RCS, role/social component summary; EQ-5D-5L, EuroQoL 5-dimension 5-level; GLFS-25, 25-question geriatric motor function rating scale; LS, locomotive syndrome; LS(NLS/LS), normal group (NLS group)/LS group (LS group)

**Table S3.** Comparison of each parameter in 2022 between the 2022N and 2022E groups in the N group

| 2022     | N         | 2022N     | 2022E     | p     | Cohen's d |
|----------|-----------|-----------|-----------|-------|-----------|
| PF       | 82.9±18.4 | 82.1±19.6 | 86±12.6   | 0.792 | -0.215    |
| RP       | 84.6±20.8 | 83.2±21.7 | 89.9±16   | 0.184 | -0.325    |
| BP       | 65±21.1   | 63.6±20.9 | 70.4±21.6 | 0.234 | -0.327    |
| GH       | 64.9±21.0 | 64.5±22.1 | 66.7±16.3 | 0.807 |           |
| VT       | 60.8±21.3 | 59.1±22.7 | 67.4±13.2 | 0.133 |           |
| SF       | 82.4±25.3 | 80.5±26   | 89.7±21.2 | 0.065 | -0.367    |
| RE       | 86.2±21.3 | 83.5±22.8 | 96.4±8.6  | 0.009 | -0.621    |
| MH       | 74.7±18.8 | 72.9±19.7 | 81.8±12.7 | 0.060 | -0.479    |
| PCS      | 45.6±11.5 | 45.6±11.7 | 45.6±11.3 | 0.873 | -0.002    |
| MCS      | 51.7±9.9  | 51.2±10.4 | 53.8±7.3  | 0.341 |           |
| RCS      | 48.9±12.3 | 47.6±13.0 | 53.6±7.7  | 0.026 |           |
| EQ-5D-5L | 0.9±0.12  | 0.9±0.13  | 0.92±0.10 | 0.327 | -0.219    |
| GLFS-25  | 11.2±11.0 | 11.3±11.9 | 10.5±6.2  | 0.552 | 0.077     |

|          |       |       |      |       |
|----------|-------|-------|------|-------|
| 2022LS   | 43/69 | 36/53 | 7/16 | 0.379 |
| (NLS/LS) |       |       |      |       |

---

N group, the group without exercise habits in 2018; 2022N group, the group without exercise habits in 2022; 2022E group, the group with exercise habits in 2022; PF, physical functioning; GH, general health; RP, physical role; BP, physical pain; VT, vitality; SF, social functioning; RE, emotional role; MH, mental health; PCS, physical component summary; MCS, mental component summary; RCS, role/social component summary; EQ-5D-5L, EuroQoL 5-dimension 5-level; GLFS-25, 25-question geriatric motor function rating scale; LS, locomotive syndrome; LS(NLS/LS), normal group (NLS group)/LS group (LS group)

**Table S4.** Logistic regression analysis of important factors in the 2022E group in the N group

| N group | B      | SE    | Wald  | df | p     | Exp(B) | 95% CI      |
|---------|--------|-------|-------|----|-------|--------|-------------|
| Sex     | -0.158 | 0.51  | 0.096 | 1  | 0.756 | 0.854  | 0.314–2.318 |
| Age     | 0.025  | 0.028 | 0.794 | 1  | 0.373 | 1.026  | 0.970–1.084 |
| RE      | 0.052  | 0.028 | 3.577 | 1  | 0.059 | 1.054  | 0.998–1.112 |
| RCS     | 0.004  | 0.038 | 0.012 | 1  | 0.913 | 1.004  | 0.932–1.081 |

N group, the group without exercise habits in 2018; 2022E group, the group with exercise habits in 2022; RE, emotional role; RCS, role/social component summary.

**Table S5.** Comparison of each parameter in 2018 between the 2022N and 2022E groups in the E group

| 2022              | E         | 2022N     | 2022E     | p      | Cohen's d |
|-------------------|-----------|-----------|-----------|--------|-----------|
| PF                | 85.1±18.5 | 76.2±22.1 | 88.7±15.7 | <0.001 |           |
| RP                | 84.7±22.4 | 76±25.9   | 88.2±19.9 | 0.024  |           |
| BP                | 71.2±22.0 | 64.9±23.9 | 73.8±20.8 | 0.105  | -0.274    |
| GH                | 67.9±21.8 | 62.5±25.2 | 70±20.1   | 0.213  | -0.12     |
| VT                | 65±18.3   | 57.3±17.2 | 68.1±18.0 | 0.009  | -0.145    |
| SF                | 78.3±26.9 | 64.1±31.6 | 83.7±23.0 | 0.003  | -0.352    |
| RE                | 86.7±21.8 | 78.7±26.1 | 89.9±19.1 | 0.038  |           |
| MH                | 76.9±17.8 | 72±16.3   | 78.9±18.1 | 0.033  | -0.096    |
| PCS               | 48.4±12.5 | 44.8±17.6 | 49.8±9.8  | 0.470  |           |
| MCS               | 53.6±9.9  | 51.9±8.1  | 54.3±10.5 | 0.151  | 0.089     |
| RCS               | 46.4±13.0 | 41.6±16.5 | 48.3±11.1 | 0.050  | -0.312    |
| EQ-5D-5L          | 0.9±0.13  | 0.84±0.19 | 0.93±0.09 | 0.048  |           |
| GLFS-25           | 10.2±11.6 | 16.2±16.7 | 7.8±7.8   | <0.001 |           |
| 2022LS<br>(NS/LS) | 37/51     | 2/23      | 35/28     | <0.001 |           |

E group, the group without exercise habits in 2018; 2022N group, the group without exercise habits in 2022; 2022E group, the group with exercise habits in 2022; BMI,



body mass index; BFP, body fat percentage; SMI, skeletal muscle mass index, PF, physical functioning; GH, general health; RP, physical role; BP, physical pain; VT, vitality; SF, social functioning; RE, emotional role; MH, mental health; PCS, physical component summary; MCS, mental component summary; RCS, role/social component summary; EQ-5D-5L, EuroQoL 5-dimension 5-level; GLFS-25, 25-question geriatric motor function rating scale; LS, locomotive syndrome; LS(NLS/LS), normal group (NLS group)/LS group (LS group)

**Table S6.** Comparison of each parameter in 2022 between the 2022N and 2022E groups in the E group

| 2022           | 2018E     | 2022N     | 2022E     | p      | Cohen's d |
|----------------|-----------|-----------|-----------|--------|-----------|
| PF             | 85.1±18.5 | 76.2±22.1 | 88.7±15.7 | <0.001 |           |
| RP             | 84.7±22.4 | 76±25.9   | 88.2±19.9 | 0.024  |           |
| BP             | 71.2±22.0 | 64.9±23.9 | 73.8±20.8 | 0.105  | -0.409    |
| GH             | 67.9±21.8 | 62.5±25.2 | 70±20.1   | 0.213  | -0.346    |
| VT             | 65±18.3   | 57.3±17.2 | 68.1±18.0 | 0.009  | -0.614    |
| SF             | 78.3±26.9 | 64.1±31.6 | 83.7±23.0 | 0.003  | -0.769    |
| RE             | 86.7±21.8 | 78.7±26.1 | 89.9±19.1 | 0.038  |           |
| MH             | 76.9±17.8 | 72±16.3   | 78.9±18.1 | 0.033  | -0.394    |
| PCS            | 48.4±12.5 | 44.8±17.6 | 49.8±9.8  | 0.470  |           |
| MCS            | 53.6±9.9  | 51.9±8.1  | 54.3±10.5 | 0.151  | -0.238    |
| RCS            | 46.4±13.0 | 41.6±16.5 | 48.3±11.1 | 0.050  |           |
| EQ-5D-5L       | 0.9±0.13  | 0.84±0.19 | 0.93±0.09 | 0.048  |           |
| GLFS-25        | 10.2±11.6 | 16.2±16.7 | 7.8±7.8   | <0.001 |           |
| 2022LS(NLS/LS) | 37/51     | 2/23      | 35/28     | <0.001 |           |

E group, the group without exercise habits in 2018; 2022N group, the group without exercise habits in 2022; 2022E group, the group with exercise habits in 2022; PF, physical functioning; GH, general health; RP, physical role; BP, physical pain; VT,

vitality; SF, social functioning; RE, emotional role; MH, mental health; PCS, physical component summary; MCS, mental component summary; RCS, role/social component summary; EQ-5D-5L, EuroQoL 5-dimension 5-level; GLFS-25, 25-question geriatric motor function rating scale; LS, locomotive syndrome; LS(NLS/LS), normal group (NLS group)/LS group (LS group)

**Table S7.** Logistic regression analysis of the important factors in the 2022E group in the E group

| E group      | B      | SE    | Wald  | df | p     | Exp(B) | 95% CI        |
|--------------|--------|-------|-------|----|-------|--------|---------------|
| Sex          | 0.023  | 0.635 | 0.001 | 1  | 0.971 | 1.023  | 0.295–3.554   |
| Age          | 0.070  | 0.040 | 3.109 | 1  | 0.078 | 1.072  | 0.992–1.159   |
| 2018PF       | 0.020  | 0.031 | 0.411 | 1  | 0.521 | 1.020  | 0.959–1.085   |
| 2022PF       | 0.018  | 0.028 | 0.408 | 1  | 0.523 | 1.018  | 0.964–1.075   |
| 2022RP       | 0.005  | 0.026 | 0.039 | 1  | 0.843 | 1.005  | 0.956–1.057   |
| 2022VT       | -0.016 | 0.028 | 0.328 | 1  | 0.567 | 0.984  | 0.932–1.039   |
| 2022SF       | 0.021  | 0.013 | 2.503 | 1  | 0.114 | 1.021  | 0.995–1.047   |
| 2022RE       | 0.002  | 0.026 | 0.004 | 1  | 0.948 | 1.002  | 0.952–1.054   |
| 2022MH       | -0.015 | 0.029 | 0.265 | 1  | 0.607 | 0.985  | 0.931–1.043   |
| 2022EQ-5D-5L | 1.108  | 2.974 | 0.139 | 1  | 0.709 | 3.030  | 0.009–1029.44 |
| 2022LS       | -2.092 | 0.912 | 5.260 | 1  | 0.022 | 0.123  | 0.021–0.738   |

E group, the group without exercise habits in 2018; 2022E group, the group with exercise habits in 2022; PF, physical functioning; RP, physical role; VT, vitality; SF, social functioning; RE, emotional role; MH, mental health; EQ-5D-5L, EuroQoL 5-dimension 5-level; LS, locomotive syndrome.
